# Supplementary material for: Rhodamine 6G hydrazone with coumarin unit: a novel single-molecule multianalyte (Cu2+ and Hg2+) sensor at different pH value
Source: Royal Society of Chemistry journal article supplement (doi:10.1039/c7ra05424f), 2017-01-01
Supplement: c7ra05424f1.pdf [file c7ra05424f1.pdf]

Supporting information for

**Rhodamine 6G hydrazone with coumarin unit: a novel single-molecule  
multianalyte ( $\text{Cu}^{2+}$  and  $\text{Hg}^{2+}$ ) sensor at different pH value**

Zhou-Qing Xu, Xian-Jie Mao, Yuan Wang\*, Wei-Na Wu\*, Pan-Dong Mao, Xiao-Lei Zhao, Yun-

Chang Fan, Hui-Jun Li\*

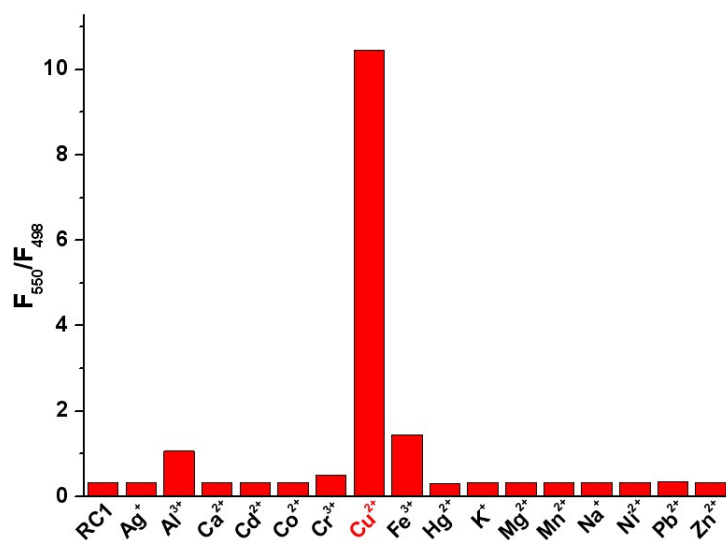

**Fig. S1** The influence of tested ions on the fluorescence intensity ratio at 550 and 498 nm ( $F_{550}/F_{498}$ ) of RC1 in  $\text{CH}_3\text{CN}/\text{H}_2\text{O}$  (9/1, v/v, pH = 7.4) solution, excitation wavelength was 445 nm.

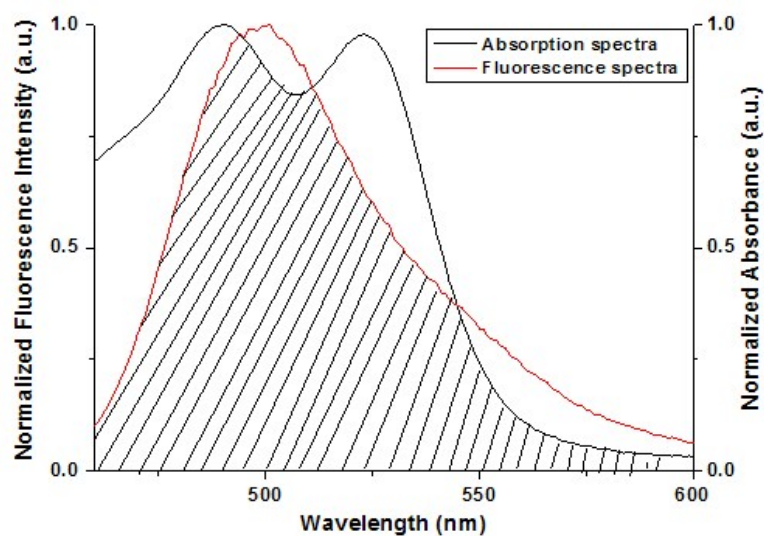

**Fig. S2** The overlap (shown with vertical stripes) between emission and absorption spectra of the donor and acceptor, respectively.

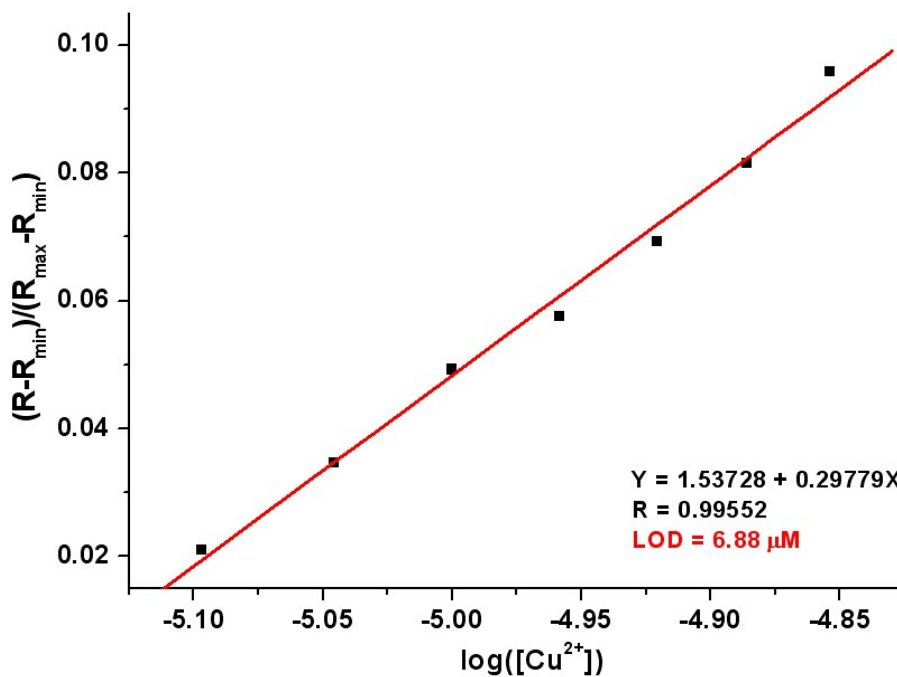

**Fig. S3** Normalized response of fluorescence ratio calibration value ( $R=F_{550}/F_{498}$ ) for **RC1** as a function of  $\text{Cu}^{2+}$  concentration in  $\text{CH}_3\text{CN}/\text{H}_2\text{O}$  (9/1, v/v, pH = 7.4) solution.

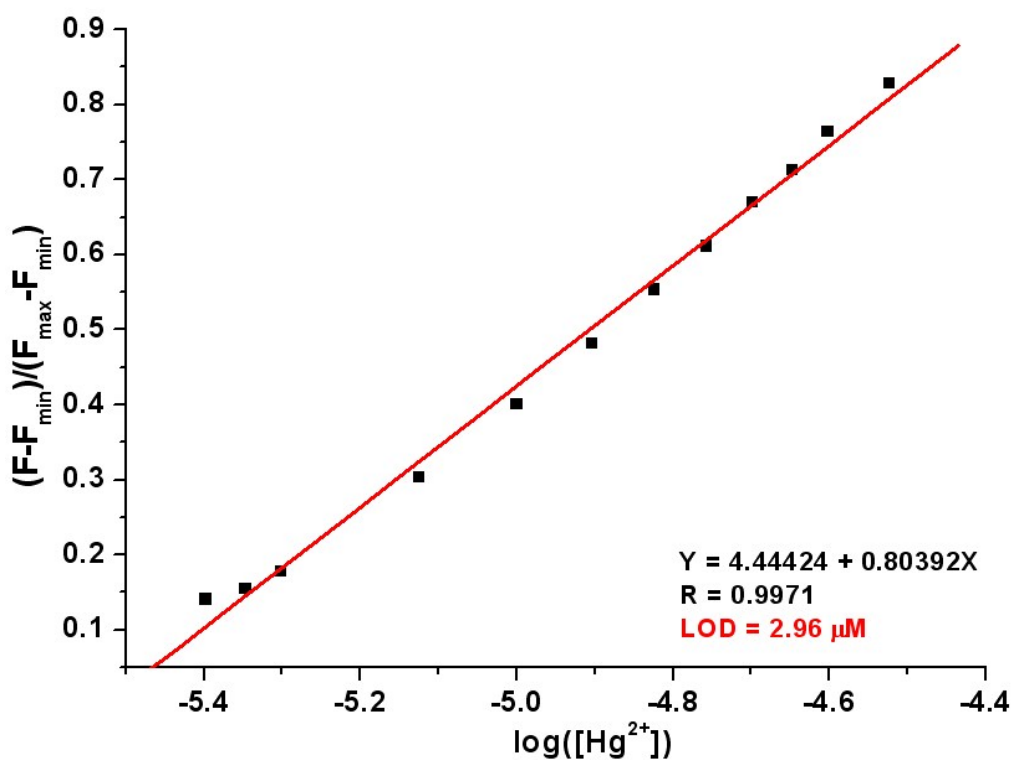

**Fig. S4** Normalized response of fluorescence calibration value (intensity at 498 nm) for **RC1** as a function of  $\text{Hg}^{2+}$  concentration in  $\text{CH}_3\text{CN}/\text{H}_2\text{O}$  (9/1, v/v, pH = 10.0) solution.

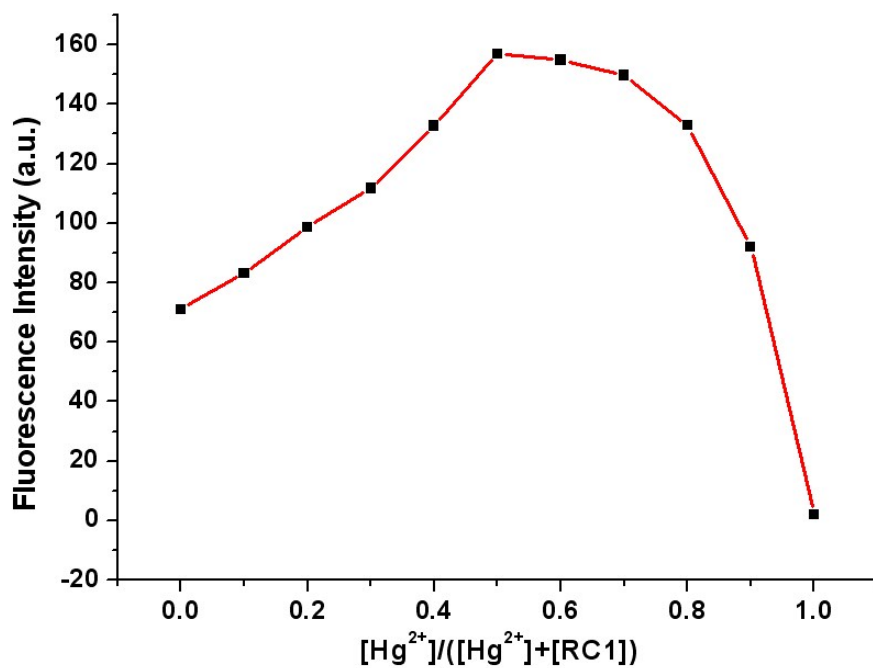

Fig. S5 Job plots of **RC1** and Hg<sup>2+</sup> in CH<sub>3</sub>CN/H<sub>2</sub>O (9/1, v/v, pH = 10.0) solution. The total concentration of **RC1** and Hg<sup>2+</sup> were all kept at 5 μM.

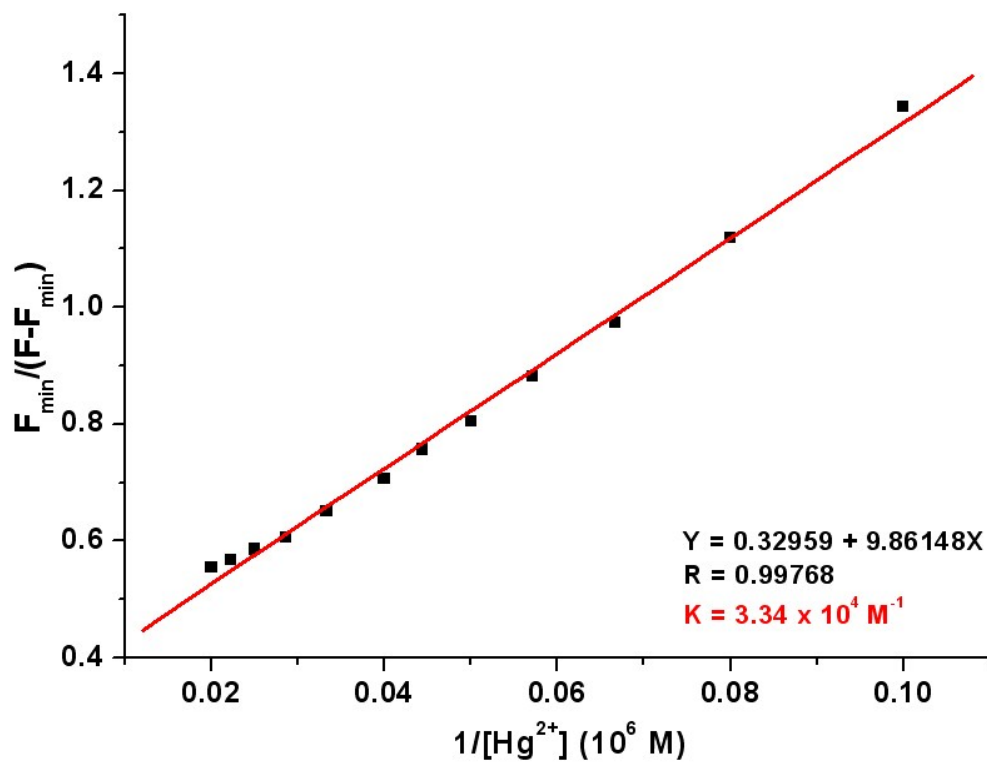

Fig. S6 The Benesi-Hildebrand plot of the **RC1**-Hg<sup>2+</sup> complex based on fluorescence intensity at 498 nm.

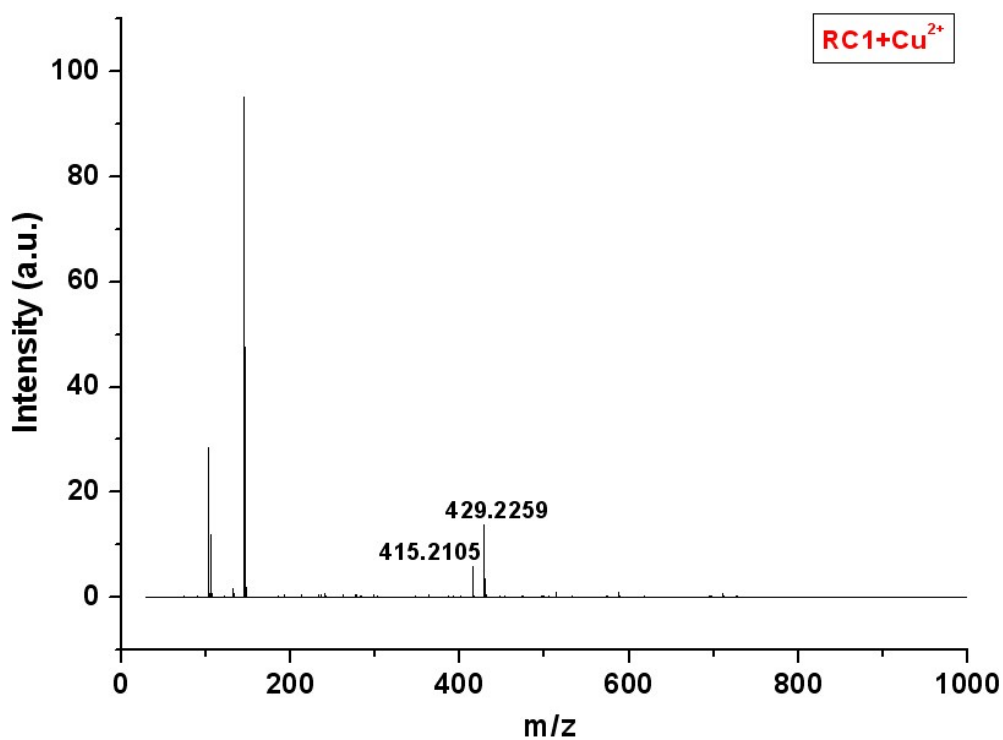

Fig. S7 ESI-MS spectrum of the sensor **RC1** with  $\text{Cu}^{2+}$  in  $\text{CH}_3\text{CN}$  solution.

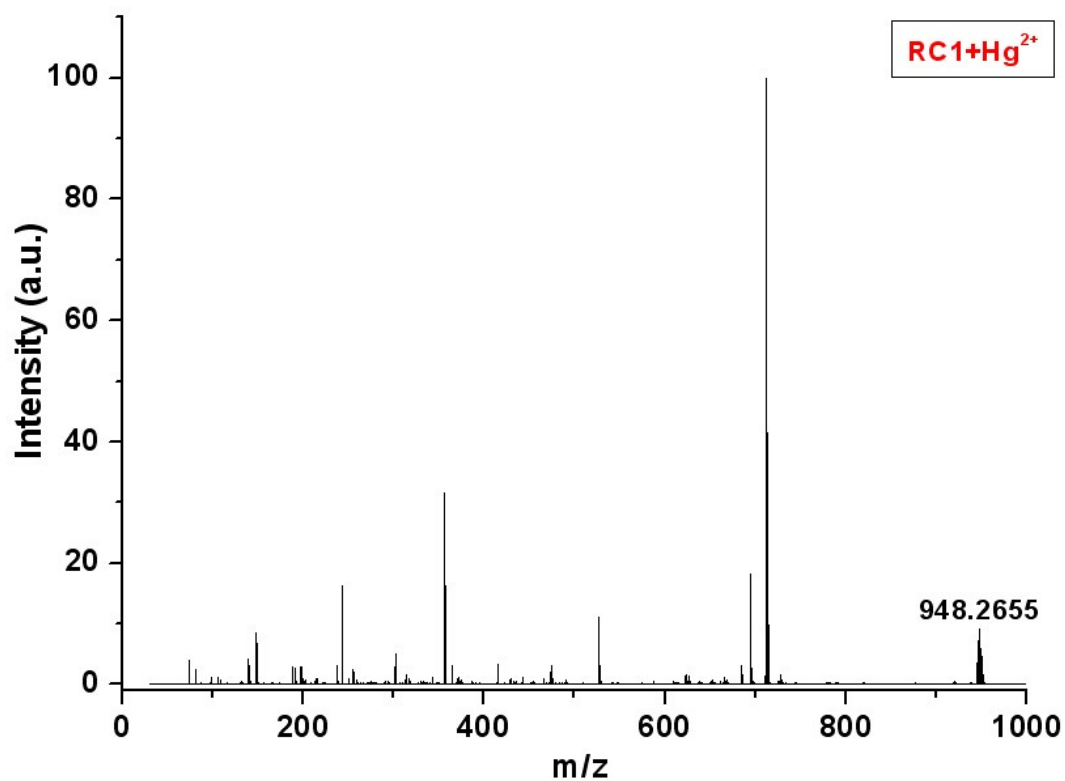

Fig. S8 ESI-MS spectrum of the sensor **RC1** with  $\text{Hg}^{2+}$  in  $\text{CH}_3\text{CN}$  solution.

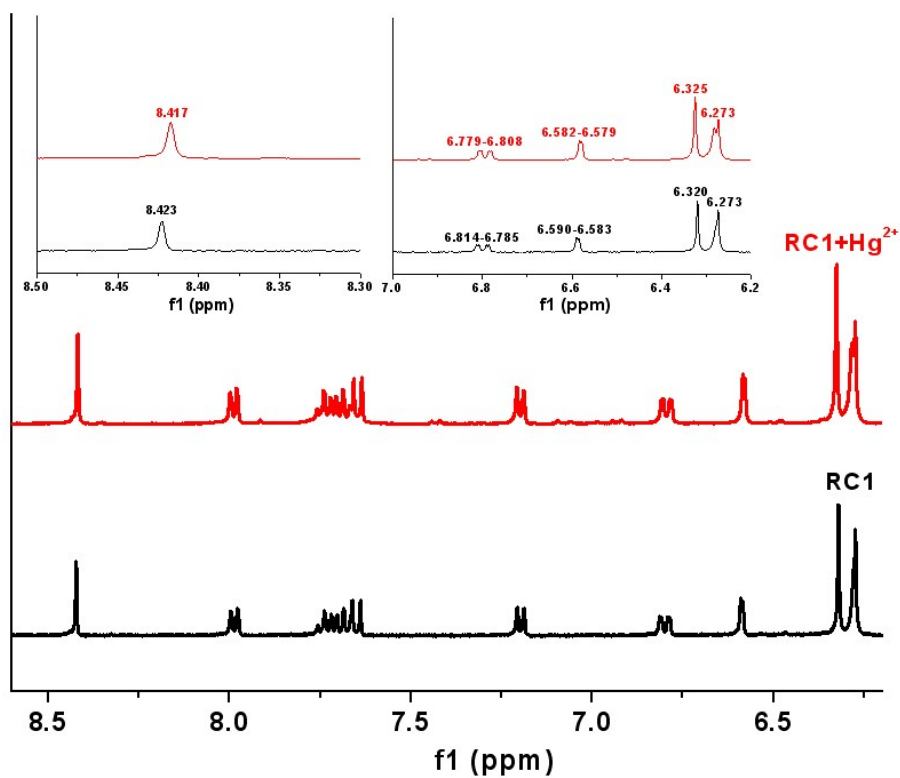

Fig. S9 Portion of <sup>1</sup>H NMR spectrum of the sensor **RC1** with and without Hg<sup>2+</sup> in DMSO-*d*<sub>6</sub> solution.

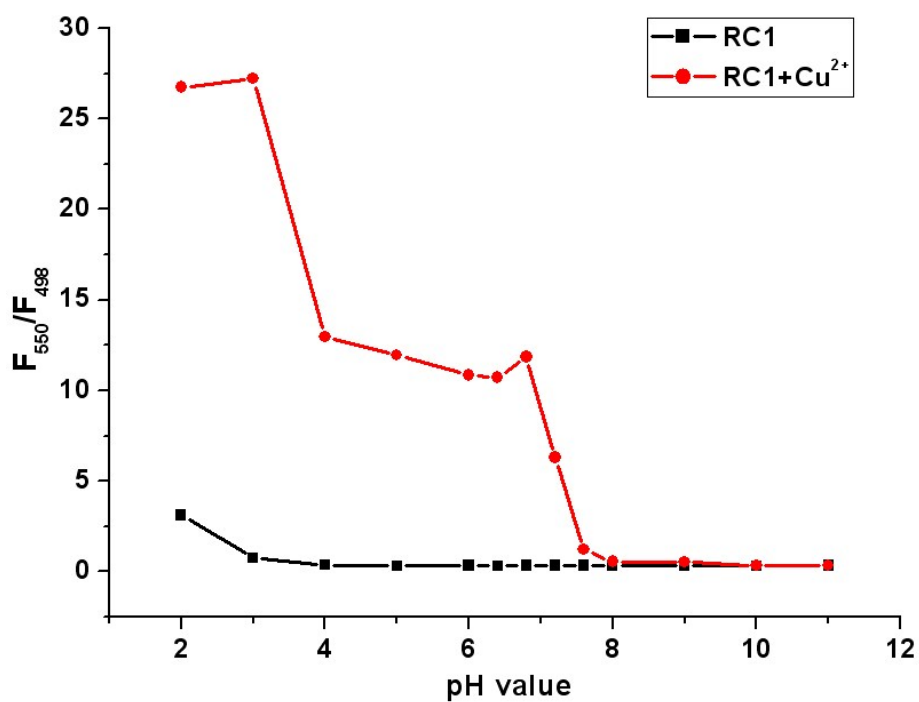

Fig. S10 The effect of pH (2.0-11.0) on the fluorescence ratio ( $F_{550}/F_{498}$ ) of 5  $\mu$ M probe **RC1** with 5 equiv. Cu<sup>2+</sup> in CH<sub>3</sub>CN/H<sub>2</sub>O (9/1, v/v, pH = 7.4) solution.

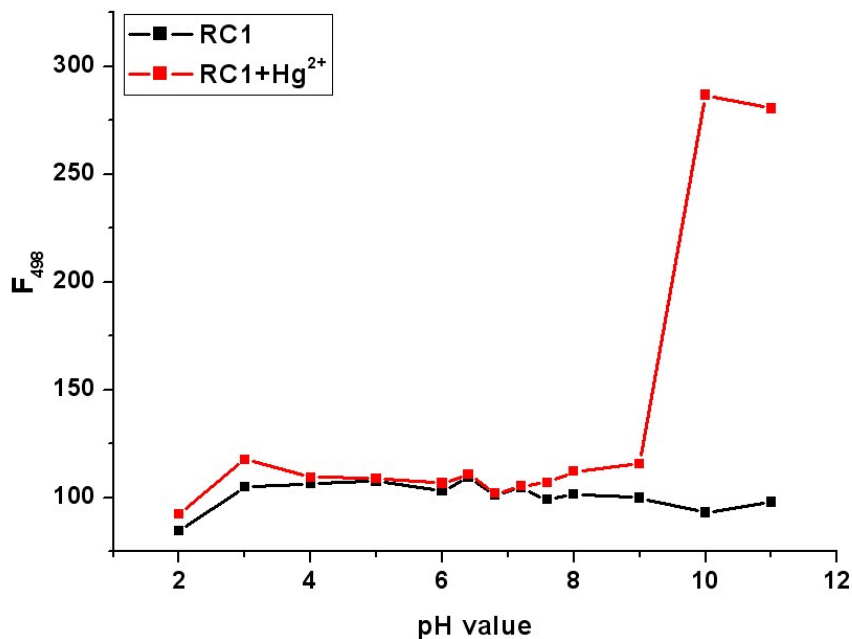

**Fig. S11** The effect of pH (2.0-11.0) on the relative fluorescence intensity of 5  $\mu\text{M}$  probe **RC1** with 5 equiv.  $\text{Hg}^{2+}$  in  $\text{CH}_3\text{CN}/\text{H}_2\text{O}$  (9/1, v/v, pH = 10.0) solution.

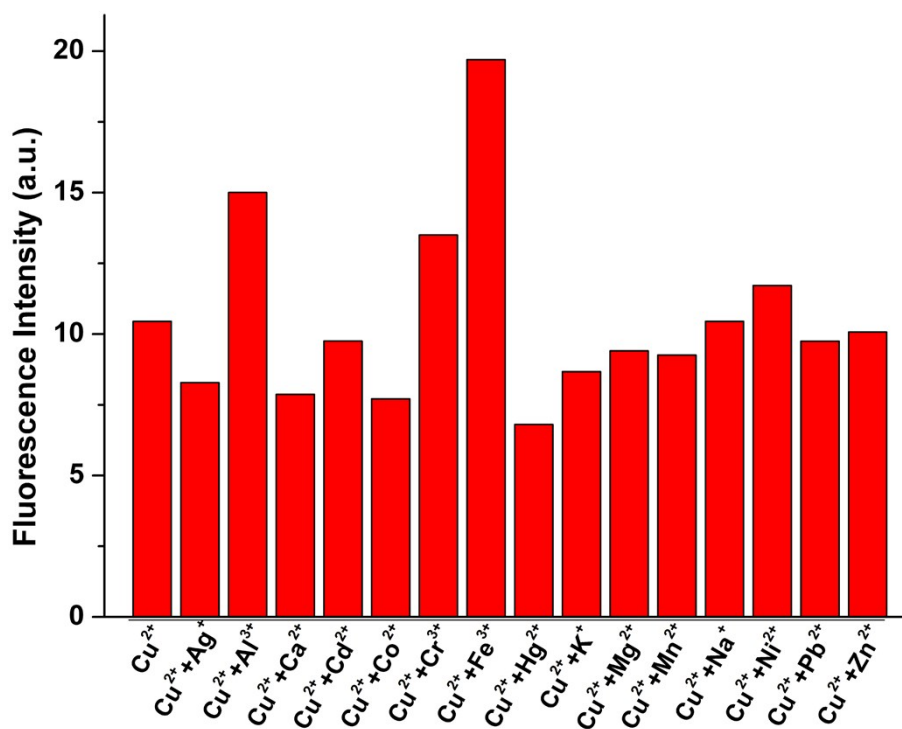

**Fig. S12** The effect of 5 equiv. coexistent metal cations on the relative fluorescence intensity of 5  $\mu\text{M}$  **RC1** with 5 equiv.  $\text{Cu}^{2+}$  in  $\text{CH}_3\text{CN}/\text{H}_2\text{O}$  (9/1, v/v, pH = 7.4) solution.

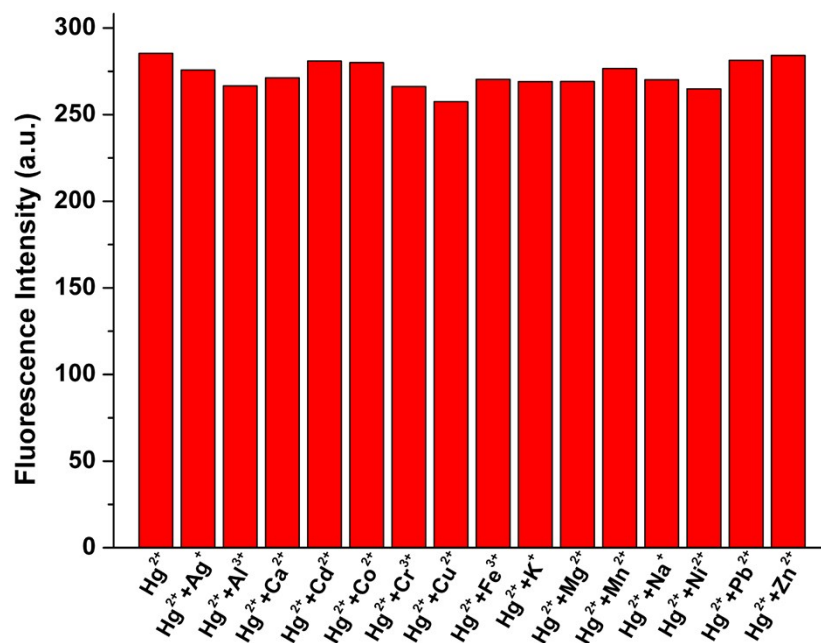

**Fig. S13** The effect of 5 equiv. coexistent metal cations on the relative fluorescence intensity of 5  $\mu\text{M}$  **RC1** with 5 equiv.  $\text{Hg}^{2+}$  in  $\text{CH}_3\text{CN}/\text{H}_2\text{O}$  (9/1, v/v, pH = 10.0) solution.

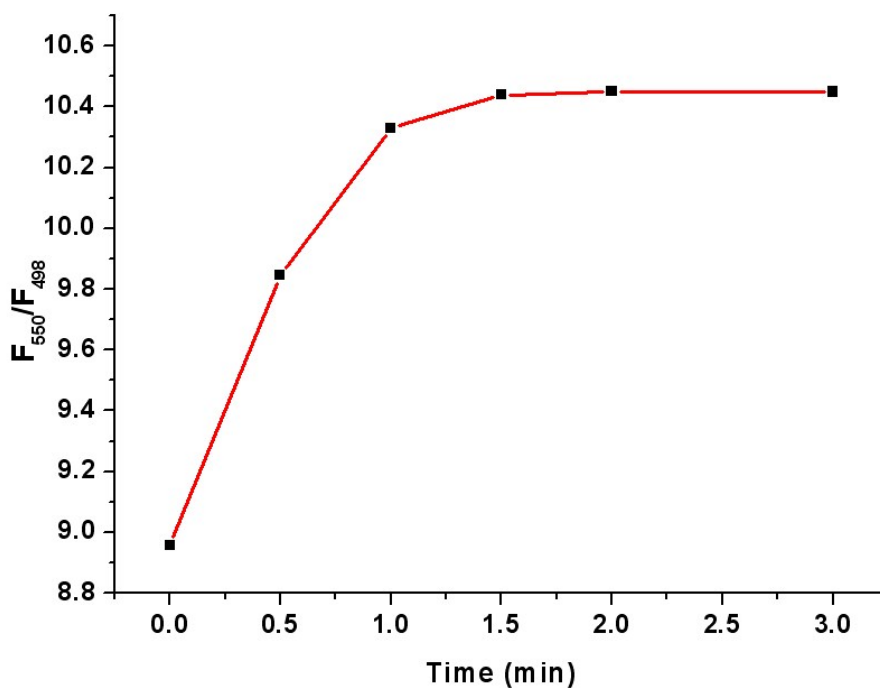

**Fig. S14** Time course for the fluorescence ratio change ( $F_{550}/F_{498}$ ) of 5  $\mu\text{M}$  **RC1** upon the addition of 5.0 equiv.  $\text{Cu}^{2+}$  in  $\text{CH}_3\text{CN}/\text{H}_2\text{O}$  (9/1, v/v, pH = 7.4) solution at room temperature.

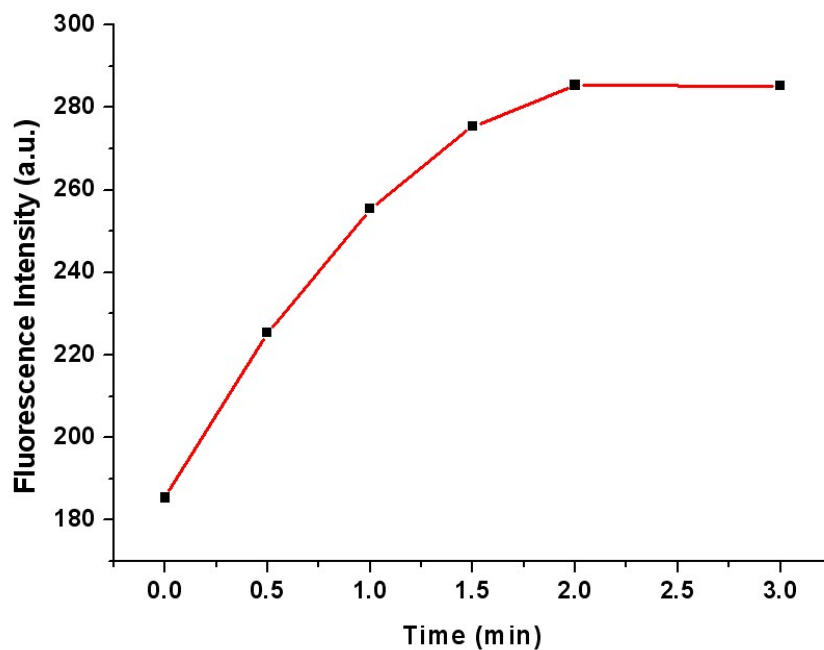

**Fig. S15** Time course for the fluorescence response at 498 nm of 5  $\mu\text{M}$  **RC1** upon the addition of 5.0 equiv.  $\text{Hg}^{2+}$  in  $\text{CH}_3\text{CN}/\text{H}_2\text{O}$  (9/1, v/v, pH = 10.0) solution at room temperature.

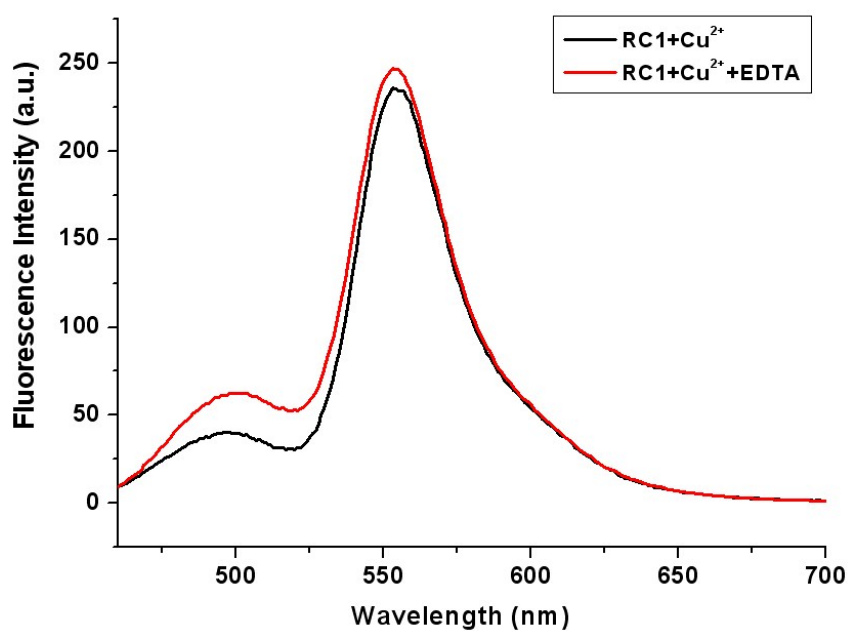

**Fig. S16** Fluorescence response of  $\text{Cu}^{2+}$  ions (5 eq.) to the sensor **RC1** (5  $\mu\text{M}$ ) with and without  $\text{Na}_2\text{EDTA}$  (5 eq.) in  $\text{CH}_3\text{CN}/\text{H}_2\text{O}$  (9/1, v/v, pH = 10.0) solution.



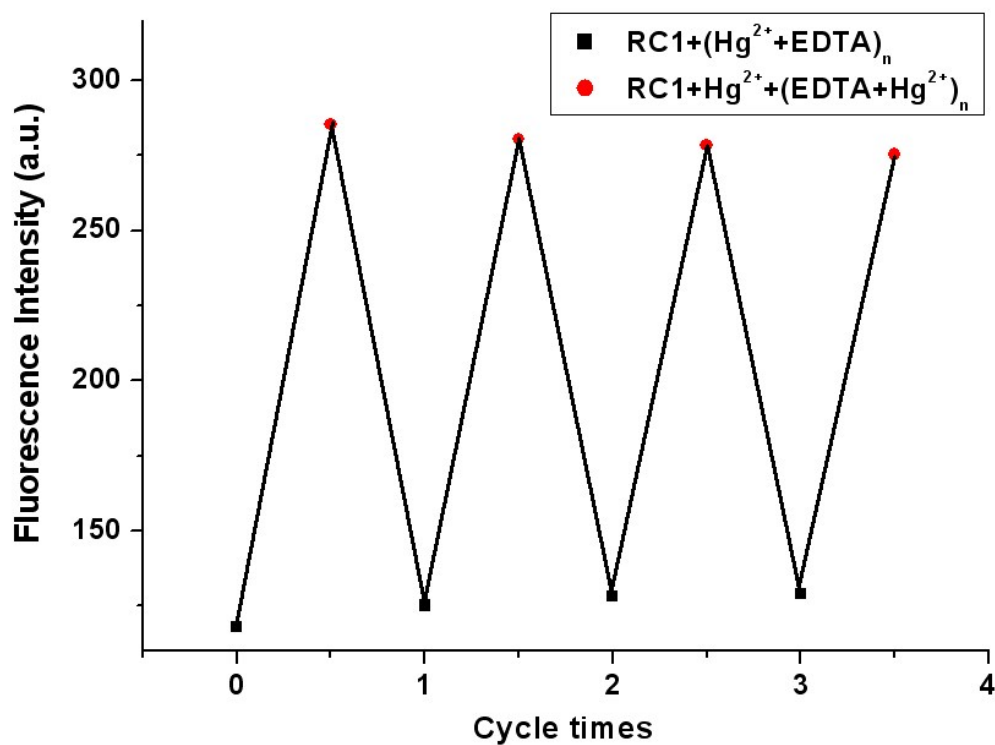

**Fig. S17** Fluorescence intensity changes (490 nm) of RC1 (5  $\mu$ M) upon alternating addition of Hg<sup>2+</sup> (5 eq.)/EDTA (5 eq.) in CH<sub>3</sub>CN/H<sub>2</sub>O (9/1, v/v, pH = 10.0) solution.

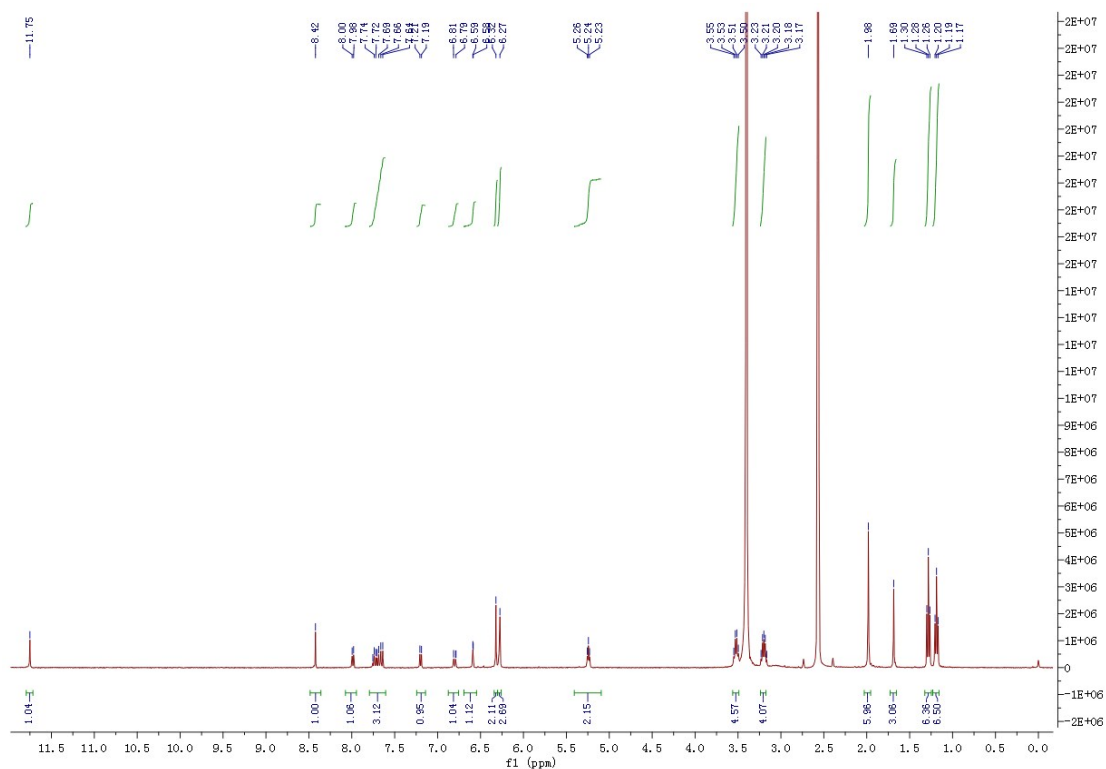

**Fig. S18** <sup>1</sup>H NMR spectrum of RC1 in DMSO-*d*<sub>6</sub> solution.

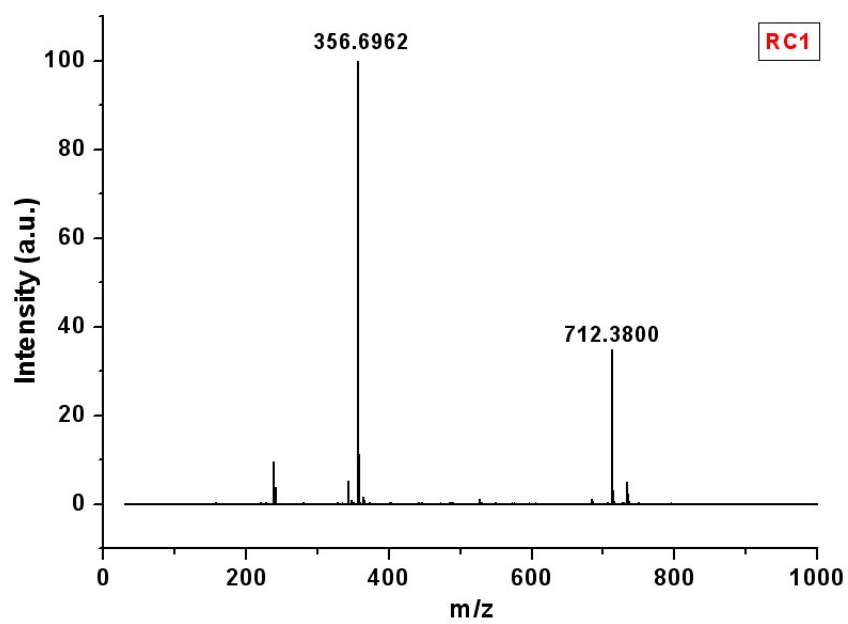

**Fig. S19** ESI-MS spectrum of **RC1** in CH<sub>3</sub>CN solution.
